# Supplementary material for: Long-read sequencing of an advanced cancer cohort resolves rearrangements, unravels haplotypes, and reveals methylation landscapes
Source: medRxiv preprint, doi:10.1101/2024.02.20.24302959, version 1 (2024-02-23)
Supplement: Supplementary Figures [file 302959_file04.pdf]

[illegible]

**Supplementary Figure 1. Insertion events called in long-read data but not in short-read.** (a) Intronic 90 bp insertion event on *EGFR* at chr7:55167011 by nanomonSV with no visible read based support for a 90 bp event. (b) Intronic 328 bp insertion event on *KDM2B* at chr12:121524684 called by nanomonSV miscalled by Illumina as a 111,113 bp inversion around chr12:121413571-121524684.
